# Supplementary material for: Ecological momentary intervention on respiratory vaccine willingness in rural older adults: A cluster randomized clinical trial
Source: Research Square preprint supplement (doi:10.21203/rs.3.rs-5372094/v1), 2024-12-02
Supplement: Supplementary file 1 [file 1e0383414c4d737822d0563a.docx]

**Research related to respiratory vaccines and disease among the rural elderly**

**Part I Demographic Information**

1. Name: _ _ _ _ _ _ _ _ _ _ _ _ _ _

2. Sex:

1) male

2) female

3. Date of birth: MM DD YY

5. Mobile phone number: _ _ _ _ _ _ _ _ _ _ _ _ _ _

6. Education level:

1) Primary and lower secondary schools

2) High/Secondary School

3) Junior college/undergraduate course

4) Master's degree or above

7. Monthly income:

1)0-1000 yuan

2)1001-2000 yuan

3)2001-3000 yuan

4)3001-4000 yuan

5) More than 4000 yuan

8. Vaccination:

1) COVID-19 vaccination: yes or no, last inoculation at _ _ _ _ _ _ _

2) Pneumococcal vaccination: yes or no, last inoculation at _ _ _ _ _ _ _

3) Influenza vaccination: yes or no, last inoculation at: _ _ _ _ _ _ _ _

9. Which of the following ways do you prevent respiratory infection on a daily basis? (Multiple choice were allowed)

1) Go out that specification wear masks

2) Communicate with people more than 1 m, preferably 2 m

3) Wash your hands frequently, wash your hands in the right way

4) Avoid with dirty hands touch nose and mouth, rubbing his eyes

5) None of the above precautions

10. Do you have the following illnesses? (multiple choices were allowed)

1) Cardiovascular and cerebrovascular diseases (i.e. hypertension, coronary heart disease, cerebral infarction, cerebral hemorrhage), please note_ _ _ _ _ _ _

2) Respiratory system diseases (i.e. bronchial asthma, bronchiectasis, chronic bronchitis, COPD, pulmonary tuberculosis), please note_ _ _ _ _ _ _

3) Chronic kidney disease (i.e. renal dysfunction), please note_ _ _ _ _ _ _

4) Immune system disorders, please note_ _ _ _ _ _ _

5) Tumor, please note_ _ _ _ _ _ _

6) Endocrine and metabolic disorders (i.e. diabetes), please note_ _ _ _ _ _ _

7) Other lung diseases, please note_ _ _ _ _ _ _

8) None of these

**Part II Activity of Daily Living (ADL) scale**

1. Your current eating habits are

1) Eat by oneself without help

2) Need help preparing meals, and be able to eat by oneself

3) Need help when eating or receiving nutrition through veins

2. When you finished changing clothes (taking clothes, dressing, buttoning and shoelaces), what was the situation?

1) Complete completely independently

2) Just need help tying your shoes

3) Need assistance in taking off and dressing

3. When you complete a bath (wipe, tub, or shower), what is your situation

1) Complete independently

2) Only partial assistance is required

3) Need help (unable to take a shower by oneself)

4. What are your situations when you complete a move (get up, stay in bed, stand from a chair, or sit down)

1) Freely (can use auxiliary equipment such as palm)

2) Need help

3) Can't get up

5. When you complete your toileting (i.e., cleaning yourself after using the toilet, urinating and defecating, and tidying up your underwear), what is your situation?

1) Without help, or with the aid of auxiliary equipment in and out of the toilet

2) Need help in and out of the toilet, after cleaning or finishing pajamas

3) Cannot enter and exit the toilet by oneself to complete the excretion process

6. Your situation with regard to controlling your bowel movement is

1) Can completely control

2) Occasionally urine out of control

3) Urination, defecation need help, need a catheter or incontinence

**Part III Mental Health Assessment (GHQ-12)**

We'll look at your health in the coming weeks. Please select the most appropriate column from the questions below. Please answer all the questions. The question here is about the situation from two or three weeks ago to now.

1. Can you concentrate while doing something?

1) Yes

2) As usual

3) No

4) Not at all

2. Is there any insomnia caused by excessive worry?

1) Yes

2) As usual

3) No

4) Not at all

3. Do you feel useful?

1) Yes

2) As usual

3) No

4) Not at all

4. Do you feel decisive?

1) Yes

2) As usual

3) No

4) Not at all

5. Always nervous?

1) Yes

2) As usual

3) No

4) Not at all

6. Think you can't solve the problem?

1) Yes

2) As usual

3) No

4) Not at all

7. Can you enjoy your daily activities?

1) Yes

2) As usual

3) No

4) Not at all

8. Can you face the problems you face?

1) Yes

2) As usual

3) No

4) Not at all

9. Feel pain, anxiety?

1) Yes

2) As usual

3) No

4) Not at all

10. Losing confidence?

1) Yes

2) As usual

3) No

4) Not at all

11. Do you feel worthless?

1) Yes

2) As usual

3) No

4) Not at all

12. Do you think everything is going well?

1) Yes

2) As usual

3) No

4) Not at all

**Part IV. Attitudes and knowledge towards respiratory diseases and vaccines**

1. **Influenza**

1. I think I'll get the influenza in the next year

1) Yes

2) No

3) Don’t know

2. I think I'll have serious symptoms after getting the influenza in the next year

1) Yes

2) No

3) Don’t know

3. I think the influenza vaccination is effective

1) Yes

2) No

3) Don’t know

4. I think the influenza vaccination is generally safe?

1) Yes

2) No

3) Don’t know

**B. COVID-19**

5.I think I'm going to get COVID-19 in the next year

1) Yes

2) No

3) Don’t know

6. I think I will have serious symptoms after COVID-19 infection in the next year

| 1) Yes  2) No  3) Don’t know |
| --- |

7. I think vaccination against COVID-19 is effective

1) Yes

2) No

3) Don’t know

8. I think vaccines in COVID-19 are generally safe

1) Yes

2) No

3) Don’t know

**C. Pneumococcal pneumonia**

9. I think I'll have pneumococcal infection in the next year

1) Yes

2) No

3) Don’t know

10. I think I will have severe symptoms after pneumonia in the next year

1) Yes

2) No

3) Don’t know

11. I think vaccination of pneumonia vaccine is effective [single-choice]

1) Yes

2) No

3) Don’t know

12. I think pneumonia vaccine is generally safer

1) Yes

2) No

3) Don’t know

**Part V Willingness towards respiratory**

1. Would you like to receive or continue to receive intensive vaccinations as described below [Multiple choices were allowed]

1) Influenza vaccine

2) COVID-19 vaccine

3) Pneumonia vaccine

4) Neither willing

1. Does your child support your vaccination against [Multiple choices were allowed]

1) Influenza vaccine

2) COVID-19 vaccine

3) Pneumonia vaccine

4) Neither willing

1. If the vaccines are free of charge, would you like to get the following vaccines [Multiple choices were allowed]

1) Influenza vaccine

2) COVID-19 vaccine

3) Pneumonia vaccine

4) Neither willing

1. If the vaccines are free of charge, will your children support your vaccination against [Multiple choices were allowed]

1) Influenza vaccine

2) COVID-19 vaccine

3) Pneumonia vaccine

4) Neither willing

1. Would you like to receive the following vaccinations if you have to pay [Multiple choices were allowed]

1) Influenza vaccine

2) COVID-19 vaccine

3) Pneumonia vaccine

4) Neither willing

1. If your child is willing to pay for the vaccines, are you willing to get the following vaccines [Multiple choices were allowed]

1) Influenza vaccine

2) COVID-19 vaccine

3) Pneumonia vaccine

4) Neither willing

1. Would you like to recommend another person for the following vaccinations [Multiple choices were allowed]

1) Influenza vaccine

2) COVID-19 vaccine

3) Pneumonia vaccine

4) Neither willing
