# Supplementary material for: Ecological momentary intervention on respiratory vaccine willingness in rural older adults: A cluster randomized clinical trial
Source: Research Square preprint supplement (doi:10.21203/rs.3.rs-5372094/v1), 2024-12-02
Supplement: Supplementary file 2 [file aaec41da96f5ac5efb1a04ff.docx]

**Table 3. Adjusted Poisson regression models for the difference in vaccination behaviors between control group and three trajectory groups.**

| **Survey time** | **Trajectory A** | | **Trajectory B** | | **Trajectory C** | |
| --- | --- | --- | --- | --- | --- | --- |
| **crude IRR** | **adjusted IRR** | **crude IRR** | **adjusted IRR** | **crude IRR** | **adjusted IRR** |
| **T2 (week 8)** | 7.19 (0.78-65.92) | 7.22 (0.77-67.47) | 4.37 (0.66-28.89) | 4.74 (0.78-28.94) | 5.02 (0.7-36.23) | 5.21 (0.76-35.56) |
| **T3 (week 10)** | 9.58 (1.23-74.85) | 9.04 (1.23-66.39) | 6.55 (1.02-41.95) | 7.03 (1.16-42.81) | 6.28 (0.94-42.01) | 6.19 (0.98-39.18) |
| **T4 (week 16)** | 9.58 (1.23-74.85) | 9.05 (1.22-67.03) | 7.1 (1.12-44.91) | 7.44 (1.21-45.82) | 7.54 (1.14-49.63) | 7.24 (1.18-44.43) |
| **T5 (week 32)** | 9.58 (1.23-74.85) | 8.99 (1.21-66.66) | 7.64 (1.2-48.48) | 7.79 (1.27-47.77) | 7.54 (1.14-49.63) | 7.14 (1.16-43.83) |
